# Supplementary material for: Carbetocin Inhibits Ethanol Behavioral Sensitization in Male and Female Mice Independent of Corticosterone Levels
Source: Preprints.org preprint supplement (doi:10.20944/preprints202309.2034.v1), 2023-09-29
Supplement: Supplementary file 3 [file supplementary]

## Sheet: Statistics
Statistical analysis
Behavioral Sensitization
4-WAY RM ANOVA - H1 X H2					3-WAY RM ANOVA - D1, D8, D15	MALE				3-WAY RM ANOVA - D1, D8, D15	FEMALE				2-WAY ANOVA - D22 MALE					2-WAY ANOVA - D22 FEMALE
Effect	F	DF	p		Effect	F	DF	p		Effect	F	DF	p		Effect	F	DF	p		Effect	F	DF	p
sex	5.28528	1,54	0.0254022		pretreatment	8.8107	1,26	0.006356		pretreatment	63.7044	1,28	1.08189e-08		pretreatment	1.56689	1,26	0.221804		pretreatment	2.87314	1,28	0.101164
pretreatment	2.1977	1,54	0.14403		treatment	2.29	1,26	0.142269		treatment	3.75526	1,28	0.0627861		treatment	13.9373	1,26	0.000933663		treatment	4.12478	1,28	0.0518518
treatment	1.32251	1,54	0.25521		pretreatment*treatment	0.9891	1,26	0.329124		pretreatment*treatment	9.21593	1,28	0.0051406		pretreatment*treatment	30.8624	1,26	7.8098e-06		pretreatment*treatment	8.77522	1,28	0.0061652
sex*pretreatment	0.503175	1,54	0.48116		time	16.2211	1,52	3e-05		time	11.1975	1,56	8.11345e-05
sex*treatment	0.0744087	1,54	0.786063		time*pretreatment	9.2164	1,52	0.000375		time*pretreatment	8.55684	1,56	0.000571876
pretreatment*treatment	1.13644	1,54	0.291149		time*treatment	0.1779	1,52	0.837571		time*treatment	0.235622	1,56	0.790858
sex*pretreatment*treatment	0.0272676	1,54	0.869459		time*pretreatment*treatment	0.3519	1,52	0.705038		time*pretreatment*treatment	0.555283	1,56	0.577037
time	18.5735	1,54	6.967e-05
time*sex	0.188746	1,54	0.665693
time*pretreatment	1.10423	1,54	0.29802
time*treatment	2.47948	1,54	0.121181
time*sex*pretreatment	0.661756	1,54	0.419513
time*sex*treatment	2.01342	1,54	0.16166
time*pretreatment*treatment	2.05528	1,54	0.157444
time*sex*pretreatment*treatment	1.98715	1,54	0.164373
CORTICOSTERONE_DAY21
3-WAY ANOVA					2-WAY ANOVA-MALES					3-WAY ANOVA-FEMALES
Effect	F	DF	p		Effect	F	DF	p		Effect	F	DF	p
sex	5.91754	1,48	0.0187683		pretreatment	0.768021	1,24	0.389517		pretreatment	6.1581	1,20	0.0220856
pretreatment	0.473312	1,48	0.494779		treatment	1.19353	1,24	0.285464		treatment	8.64177	1,20	0.00810209
treatment	0.894578	1,48	0.348977		pretreatment*treatment	1.14617	1,24	0.295002		cycle	73.509	1,20	3.93363e-08
sex*pretreatment	2.23644	1,48	0.141338							pretreatment*treatment	0.825221	1,20	0.374475
sex*treatment	0.00369776	1,48	0.951764							pretreatment*cycle	0.00795512	1,20	0.929817
pretreatment*treatment	2.95143	1,48	0.0922473							treatment*cycle	4.09907	1,20	0.0564667
sex*pretreatment*treatment	0.535115	1,48	0.468021							pretreatment*treatment*cycle	0.0302858	1,20	0.863593
CORTICOSTERONE_DAY22
3-WAY ANOVA					2-WAY ANOVA-MALES					3-WAY ANOVA-FEMALES
Effect	F	DF	p		Effect	F	DF	p		Effect	F	DF	p
sex	22.2704	1,36	3.53271e-05		pretreatment	5.01506	1,16	0.0396836		pretreatment	22.4972	1,16	0.000220501
pretreatment	18.7236	1,36	0.000114855		treatment	8.66592	1,16	0.00953284		treatment	0.121267	1,16	0.732204
treatment	3.06764	1,36	0.0883821		pretreatment*treatment	3.52396	1,16	0.0788437		cycle	12.2641	1,16	0.00295098
sex*pretreatment	5.68525	1,36	0.0224998							pretreatment*treatment	1.16713	1,16	0.296007
sex*treatment	0.643641	1,36	0.42766							pretreatment*cycle	1.71881	1,16	0.208352
pretreatment*treatment	0.80793	1,36	0.374706							treatment*cycle	1.89176	1,16	0.187956
sex*pretreatment*treatment	6.38743	1,36	0.0160261							pretreatment*treatment*cycle	3.44818	1,16	0.0818282
BEC (Blood ethanol concentration)
3-WAY ANOVA
Effect	F	DF	p
sex	5.77416	1,32	0.0222347
pretreatment	17.9448	1,32	0.000179609
treatment	0.22154	1,32	0.641061
sex*pretreatment	0.383553	1,32	0.540092
sex*treatment	0.0300706	1,32	0.863422
pretreatment*treatment	0.447376	1,32	0.50838
sex*pretreatment*treatment	1.0316	1,32	0.3174
